# Supplementary material for: Nitrogen Cycling in CMIP6 Land Surface Models: Progress and Limitations
Source: Copernicus journal article supplement (doi:10.5194/bg-2019-513), 2020-01-10
Supplement: Supplementary file 1 [file bg-2019-513-supplement.pdf]

## Supporting Information

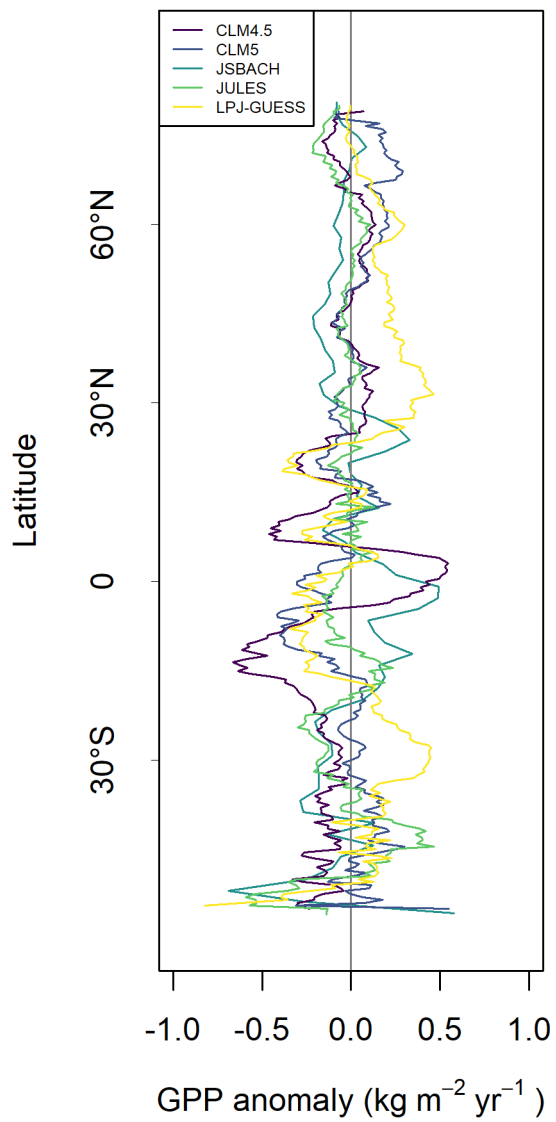

SI Fig. 1 Model output of 1982-2011 mean gross primary productivity (GPP) averaged by latitude, shown as the anomaly of the corresponding observation-based estimate (MTE) published by Jung et al. (2011).

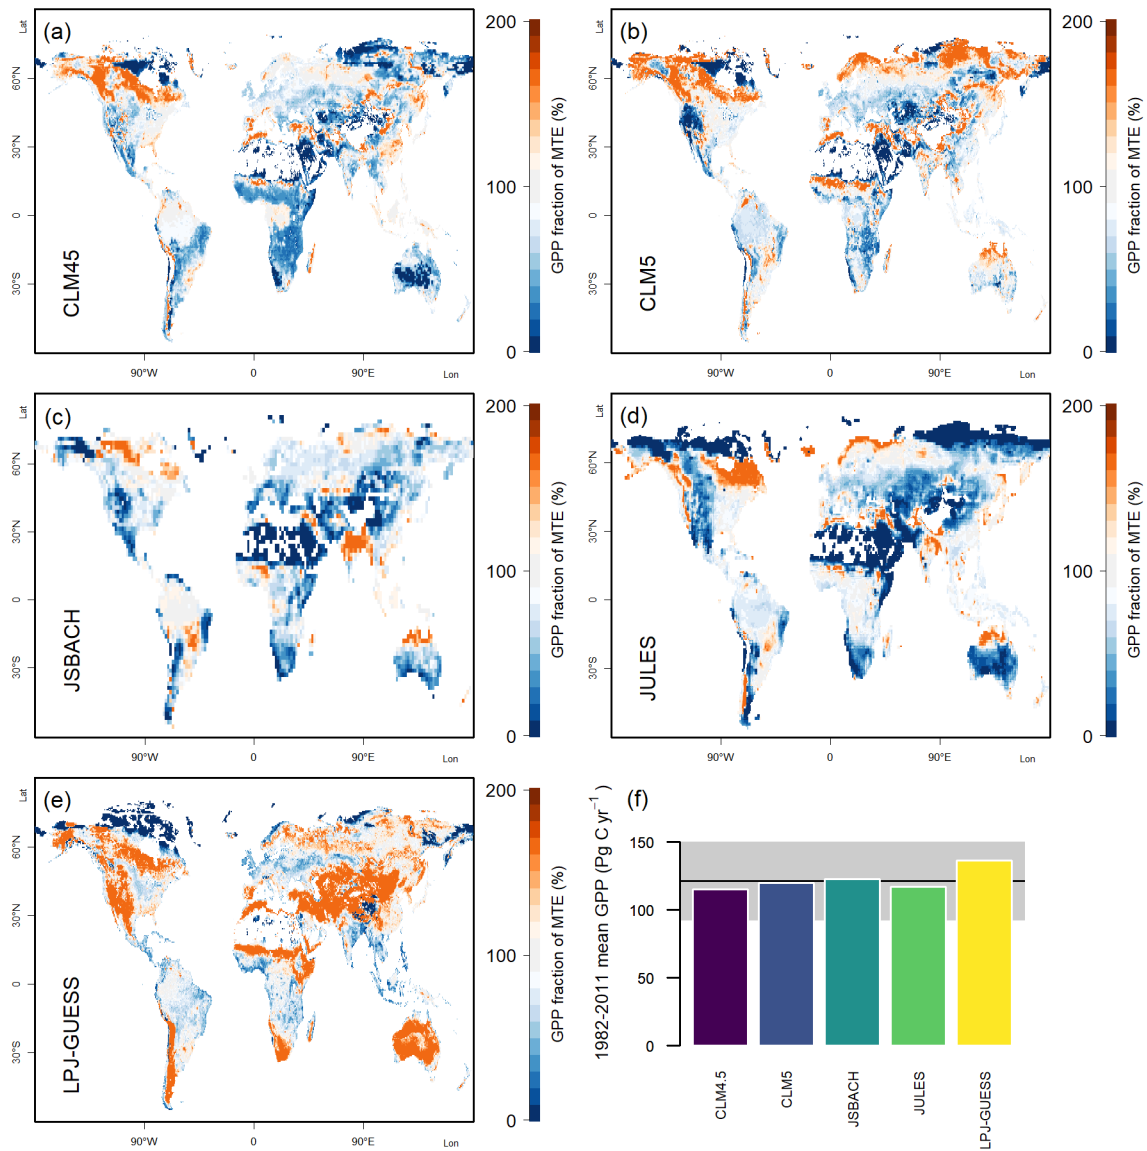

SI Fig. 2 Model output of 1982-2011 mean gross primary productivity (GPP). (a) – (e) Model estimates, shown as a percentage of the corresponding observation-based estimate (MTE) published by Jung et al. (2011). (f) Globally integrated estimates. Black line indicates the global average from the observation-based source; grey area indicates the globally integrated standard deviation from the global average in the model tree ensemble applied to obtain the global average.
